# Supplementary material
Source: PubMed Central journal article supplement (PMC5940560)
Supplement: NIHMS952432-supplement-2.pdf [file NIHMS952432-supplement-2.pdf]

**Supplemental video.** Electrical field stimulation of the splenic capsule loaded with the Ca<sup>2+</sup> sensitive dye Fluo4-AM reveals a dense network of nerves immediately below the mesothelial cell layer. Original Magnification 40X.
